# Supplementary material for: The Westernmost Record of the Scyphomedusa Cassiopea andromeda (Forskål, 1775) in the Mediterranean: Marine Citizen Science Contributions to Invasive Species Detection and Monitoring
Source: Environ Manage. 2025 Sep 30;75(12):3721–35. doi: 10.1007/s00267-025-02289-w (PMC12575570; doi:10.1007/s00267-025-02289-w)
Supplement: Supplementary file 1 — Supplementary information [file 267_2025_2289_MOESM1_ESM.xlsx]

## Sheet: Manuscript info
The westernmost record of the scyphomedusa Cassiopea andromeda in the Mediterranean: marine citizen science contributions to invasive species detection and monitoring.
Marambio, Macarena1*; Pascual-Torner, Maria1*; Tilves, Uxue1; Pérez, Alejandra2; Ballesteros, Ainara3; and Gili, Josep-Maria1
*Corresponding autor: marambio@icm.csic.es, mpascual@icm.csic.es
Macarena Marambio: 0000-0003-1083-0780
Maria Pascual-Torner: 0000-0002-7483-9883
Uxue Tilves: 0000-0002-0586-1155
Ainara Ballesteros: 0000-0003-2720-4313
Josep Maria Gili: 0000-0001-9542-2385
Macarena Marambio and Maria Pascual-Torner have contributed equally to this work.
1 Department of Marine Biology and Oceanography, Institut de Ciències del Mar (ICM-CSIC), Pg. Marítim de la Barceloneta 37, 08003 Barcelona, Spain.
2Aquatours Almería Aventuras Submarinas. Club Náutico Aguadulce Local bajo, Puerto Deportivo de Aguadulce, 04720 Almería, Spain.
3IMEDMAR-UCV – Institute of Environment and Marine Science Research, Universidad Católica de Valencia SVM, C. Explanada del Puerto s/n, Calp, 03710 Alicante, Spain.

## Sheet: K80_16S
Kimura 2-parameter (K80) distances of 16S sequences among the species analysed in this study.
species	CSA331491	CSA331494	CSA331488	CSA331484	CSA331485	CSA331492	CSA331493	CSA331487	CSA331495	CSA331486	CSA331489	CSA331490	OP503932	OP503939	KY610611	KY610613	KY610614	OP503922	OP503929	MW164863	MW164864	MW164865	MW164866	MW164859	MW164869	MW164886	MW164879	AB720918	OL721669	KY610617	MT902932	KU901021
CSA331491	0	0	0	0.002	0.005	0.005	0	0	0	0	0	0.002	0	0	0.002	0.034	0.034	0.034	0.034	0.121	0.121	0.121	0.124	0.112	0.115	0.115	0.11	0.124	0.132	0.151	0.214	0.195
CSA331494	0	0	0	0.002	0.005	0.005	0	0	0	0	0	0.002	0	0	0.002	0.034	0.034	0.034	0.034	0.121	0.121	0.121	0.124	0.112	0.115	0.115	0.11	0.124	0.132	0.151	0.214	0.195
CSA331488	0	0	0	0.002	0.005	0.005	0	0	0	0	0	0.002	0	0	0.002	0.034	0.034	0.034	0.034	0.121	0.121	0.121	0.124	0.112	0.115	0.115	0.11	0.124	0.132	0.151	0.214	0.195
CSA331484	0.002	0.002	0.002	0	0.002	0.002	0.002	0.002	0.002	0.002	0.002	0	0.002	0.002	0.005	0.037	0.037	0.037	0.037	0.124	0.124	0.124	0.127	0.115	0.118	0.118	0.113	0.126	0.135	0.148	0.211	0.192
CSA331485	0.005	0.005	0.005	0.002	0	0	0.005	0.005	0.005	0.005	0.005	0.002	0.005	0.005	0.007	0.039	0.039	0.039	0.039	0.127	0.127	0.127	0.13	0.118	0.121	0.121	0.115	0.129	0.138	0.151	0.214	0.195
CSA331492	0.005	0.005	0.005	0.002	0	0	0.005	0.005	0.005	0.005	0.005	0.002	0.005	0.005	0.007	0.039	0.039	0.039	0.039	0.127	0.127	0.127	0.13	0.118	0.121	0.121	0.115	0.129	0.138	0.151	0.214	0.195
CSA331493	0	0	0	0.002	0.005	0.005	0	0	0	0	0	0.002	0	0	0.002	0.034	0.034	0.034	0.034	0.121	0.121	0.121	0.124	0.112	0.115	0.115	0.11	0.124	0.132	0.151	0.214	0.195
CSA331487	0	0	0	0.002	0.005	0.005	0	0	0	0	0	0.002	0	0	0.002	0.034	0.034	0.034	0.034	0.121	0.121	0.121	0.124	0.112	0.115	0.115	0.11	0.124	0.132	0.151	0.214	0.195
CSA331495	0	0	0	0.002	0.005	0.005	0	0	0	0	0	0.002	0	0	0.002	0.034	0.034	0.034	0.034	0.121	0.121	0.121	0.124	0.112	0.115	0.115	0.11	0.124	0.132	0.151	0.214	0.195
CSA331486	0	0	0	0.002	0.005	0.005	0	0	0	0	0	0.002	0	0	0.002	0.034	0.034	0.034	0.034	0.121	0.121	0.121	0.124	0.112	0.115	0.115	0.11	0.124	0.132	0.151	0.214	0.195
CSA331489	0	0	0	0.002	0.005	0.005	0	0	0	0	0	0.002	0	0	0.002	0.034	0.034	0.034	0.034	0.121	0.121	0.121	0.124	0.112	0.115	0.115	0.11	0.124	0.132	0.151	0.214	0.195
CSA331490	0.002	0.002	0.002	0	0.002	0.002	0.002	0.002	0.002	0.002	0.002	0	0.002	0.002	0.005	0.037	0.037	0.037	0.037	0.124	0.124	0.124	0.127	0.115	0.118	0.118	0.113	0.126	0.135	0.148	0.211	0.192
OP503932	0	0	0	0.002	0.005	0.005	0	0	0	0	0	0.002	0	0	0.002	0.034	0.034	0.034	0.034	0.121	0.121	0.121	0.124	0.112	0.115	0.115	0.11	0.124	0.132	0.151	0.214	0.195
OP503939	0	0	0	0.002	0.005	0.005	0	0	0	0	0	0.002	0	0	0.002	0.034	0.034	0.034	0.034	0.121	0.121	0.121	0.124	0.112	0.115	0.115	0.11	0.124	0.132	0.151	0.214	0.195
KY610611	0.002	0.002	0.002	0.005	0.007	0.007	0.002	0.002	0.002	0.002	0.002	0.005	0.002	0.002	0	0.031	0.031	0.031	0.031	0.118	0.118	0.118	0.121	0.109	0.115	0.115	0.11	0.121	0.129	0.154	0.214	0.192
KY610613	0.034	0.034	0.034	0.037	0.039	0.039	0.034	0.034	0.034	0.034	0.034	0.037	0.034	0.034	0.031	0	0	0	0	0.118	0.118	0.118	0.121	0.109	0.121	0.121	0.11	0.121	0.124	0.154	0.214	0.186
KY610614	0.034	0.034	0.034	0.037	0.039	0.039	0.034	0.034	0.034	0.034	0.034	0.037	0.034	0.034	0.031	0	0	0	0	0.118	0.118	0.118	0.121	0.109	0.121	0.121	0.11	0.121	0.124	0.154	0.214	0.186
OP503922	0.034	0.034	0.034	0.037	0.039	0.039	0.034	0.034	0.034	0.034	0.034	0.037	0.034	0.034	0.031	0	0	0	0	0.118	0.118	0.118	0.121	0.109	0.121	0.121	0.11	0.121	0.124	0.154	0.214	0.186
OP503929	0.034	0.034	0.034	0.037	0.039	0.039	0.034	0.034	0.034	0.034	0.034	0.037	0.034	0.034	0.031	0	0	0	0	0.118	0.118	0.118	0.121	0.109	0.121	0.121	0.11	0.121	0.124	0.154	0.214	0.186
MW164863	0.121	0.121	0.121	0.124	0.127	0.127	0.121	0.121	0.121	0.121	0.121	0.124	0.121	0.121	0.118	0.118	0.118	0.118	0.118	0	0	0.005	0.002	0.017	0.132	0.132	0.129	0.115	0.109	0.164	0.237	0.217
MW164864	0.121	0.121	0.121	0.124	0.127	0.127	0.121	0.121	0.121	0.121	0.121	0.124	0.121	0.121	0.118	0.118	0.118	0.118	0.118	0	0	0.005	0.002	0.017	0.132	0.132	0.129	0.115	0.109	0.164	0.237	0.217
MW164865	0.121	0.121	0.121	0.124	0.127	0.127	0.121	0.121	0.121	0.121	0.121	0.124	0.121	0.121	0.118	0.118	0.118	0.118	0.118	0.005	0.005	0	0.002	0.012	0.126	0.126	0.124	0.115	0.109	0.161	0.233	0.214
MW164866	0.124	0.124	0.124	0.127	0.13	0.13	0.124	0.124	0.124	0.124	0.124	0.127	0.124	0.124	0.121	0.121	0.121	0.121	0.121	0.002	0.002	0.002	0	0.014	0.129	0.129	0.126	0.118	0.112	0.161	0.237	0.217
MW164859	0.112	0.112	0.112	0.115	0.118	0.118	0.112	0.112	0.112	0.112	0.112	0.115	0.112	0.112	0.109	0.109	0.109	0.109	0.109	0.017	0.017	0.012	0.014	0	0.124	0.124	0.121	0.112	0.112	0.164	0.24	0.207
MW164869	0.115	0.115	0.115	0.118	0.121	0.121	0.115	0.115	0.115	0.115	0.115	0.118	0.115	0.115	0.115	0.121	0.121	0.121	0.121	0.132	0.132	0.126	0.129	0.124	0	0	0.009	0.085	0.094	0.192	0.235	0.225
MW164886	0.115	0.115	0.115	0.118	0.121	0.121	0.115	0.115	0.115	0.115	0.115	0.118	0.115	0.115	0.115	0.121	0.121	0.121	0.121	0.132	0.132	0.126	0.129	0.124	0	0	0.009	0.085	0.094	0.192	0.235	0.225
MW164879	0.11	0.11	0.11	0.113	0.115	0.115	0.11	0.11	0.11	0.11	0.11	0.113	0.11	0.11	0.11	0.11	0.11	0.11	0.11	0.129	0.129	0.124	0.126	0.121	0.009	0.009	0	0.075	0.083	0.186	0.221	0.218
AB720918	0.124	0.124	0.124	0.126	0.129	0.129	0.124	0.124	0.124	0.124	0.124	0.126	0.124	0.124	0.121	0.121	0.121	0.121	0.121	0.115	0.115	0.115	0.118	0.112	0.085	0.085	0.075	0	0.007	0.192	0.22	0.221
OL721669	0.132	0.132	0.132	0.135	0.138	0.138	0.132	0.132	0.132	0.132	0.132	0.135	0.132	0.132	0.129	0.124	0.124	0.124	0.124	0.109	0.109	0.109	0.112	0.112	0.094	0.094	0.083	0.007	0	0.189	0.217	0.224
KY610617	0.151	0.151	0.151	0.148	0.151	0.151	0.151	0.151	0.151	0.151	0.151	0.148	0.151	0.151	0.154	0.154	0.154	0.154	0.154	0.164	0.164	0.161	0.161	0.164	0.192	0.192	0.186	0.192	0.189	0	0.201	0.207
MT902932	0.214	0.214	0.214	0.211	0.214	0.214	0.214	0.214	0.214	0.214	0.214	0.211	0.214	0.214	0.214	0.214	0.214	0.214	0.214	0.237	0.237	0.233	0.237	0.24	0.235	0.235	0.221	0.22	0.217	0.201	0	0.155
KU901021	0.195	0.195	0.195	0.192	0.195	0.195	0.195	0.195	0.195	0.195	0.195	0.192	0.195	0.195	0.192	0.186	0.186	0.186	0.186	0.217	0.217	0.214	0.217	0.207	0.225	0.225	0.218	0.221	0.224	0.207	0.155	0

## Sheet: K80_COI
Kimura 2-parameter (K80) distances of COI sequences among the species analysed in this study.
species	CSA496007	CSA496004	CSA331498	CSA496001	CSA331497	CSA496003	CSA496005	CSA331499	ca4_CaCOIF	ca1_CaCOIF	ca2_CaCOIF	OP503345.1	OP503367.1	KY610551.1	AY319458.1	OP503341.1	OP503334.1	KY610558.1	KY610559.1	MW160913.1	MW160930.1	MW160923.1	AY319472.1	OL799293.1	MW160936.1	MW160937.1	MW160934.1	MW160935.1	MW160931.1	AY319467.1	MT904380.1	KU901397.1
CSA496007	0	0	0	0.002	0	0	0	0	0.002	0.002	0	0	0	0.007	0.002	0.077	0.077	0.077	0.077	0.187	0.19	0.187	0.208	0.208	0.189	0.189	0.183	0.183	0.171	0.222	0.222	0.254
CSA496004	0	0	0	0.002	0	0	0	0	0.002	0.002	0	0	0	0.007	0.002	0.077	0.077	0.077	0.077	0.187	0.19	0.187	0.208	0.208	0.189	0.189	0.183	0.183	0.171	0.222	0.222	0.254
CSA331498	0	0	0	0.002	0	0	0	0	0.002	0.002	0	0	0	0.007	0.002	0.077	0.077	0.077	0.077	0.187	0.19	0.187	0.208	0.208	0.189	0.189	0.183	0.183	0.171	0.222	0.222	0.254
CSA496001	0.002	0.002	0.002	0	0.002	0.002	0.002	0.002	0.005	0.005	0.002	0.002	0.002	0.009	0.005	0.08	0.08	0.08	0.08	0.189	0.192	0.189	0.208	0.208	0.189	0.189	0.183	0.183	0.171	0.222	0.225	0.251
CSA331497	0	0	0	0.002	0	0	0	0	0.002	0.002	0	0	0	0.007	0.002	0.077	0.077	0.077	0.077	0.187	0.19	0.187	0.208	0.208	0.189	0.189	0.183	0.183	0.171	0.222	0.222	0.254
CSA496003	0	0	0	0.002	0	0	0	0	0.002	0.002	0	0	0	0.007	0.002	0.077	0.077	0.077	0.077	0.187	0.19	0.187	0.208	0.208	0.189	0.189	0.183	0.183	0.171	0.222	0.222	0.254
CSA496005	0	0	0	0.002	0	0	0	0	0.002	0.002	0	0	0	0.007	0.002	0.077	0.077	0.077	0.077	0.187	0.19	0.187	0.208	0.208	0.189	0.189	0.183	0.183	0.171	0.222	0.222	0.254
CSA331499	0	0	0	0.002	0	0	0	0	0.002	0.002	0	0	0	0.007	0.002	0.077	0.077	0.077	0.077	0.187	0.19	0.187	0.208	0.208	0.189	0.189	0.183	0.183	0.171	0.222	0.222	0.254
ca4_CaCOIF	0.002	0.002	0.002	0.005	0.002	0.002	0.002	0.002	0	0.005	0.002	0.002	0.002	0.009	0.005	0.08	0.08	0.08	0.08	0.189	0.192	0.189	0.211	0.211	0.192	0.192	0.186	0.186	0.174	0.225	0.225	0.257
ca1_CaCOIF	0.002	0.002	0.002	0.005	0.002	0.002	0.002	0.002	0.005	0	0.002	0.002	0.002	0.009	0.005	0.08	0.08	0.08	0.08	0.189	0.192	0.189	0.211	0.211	0.192	0.192	0.186	0.186	0.174	0.225	0.225	0.253
ca2_CaCOIF	0	0	0	0.002	0	0	0	0	0.002	0.002	0	0	0	0.007	0.002	0.077	0.077	0.077	0.077	0.187	0.19	0.187	0.208	0.208	0.189	0.189	0.183	0.183	0.171	0.222	0.222	0.254
OP503345.1	0	0	0	0.002	0	0	0	0	0.002	0.002	0	0	0	0.007	0.002	0.077	0.077	0.077	0.077	0.187	0.19	0.187	0.208	0.208	0.189	0.189	0.183	0.183	0.171	0.222	0.222	0.254
OP503367.1	0	0	0	0.002	0	0	0	0	0.002	0.002	0	0	0	0.007	0.002	0.077	0.077	0.077	0.077	0.187	0.19	0.187	0.208	0.208	0.189	0.189	0.183	0.183	0.171	0.222	0.222	0.254
KY610551.1	0.007	0.007	0.007	0.009	0.007	0.007	0.007	0.007	0.009	0.009	0.007	0.007	0.007	0	0.009	0.08	0.08	0.08	0.08	0.187	0.183	0.18	0.208	0.208	0.192	0.192	0.186	0.186	0.177	0.219	0.225	0.264
AY319458.1	0.002	0.002	0.002	0.005	0.002	0.002	0.002	0.002	0.005	0.005	0.002	0.002	0.002	0.009	0	0.075	0.075	0.075	0.075	0.183	0.187	0.183	0.205	0.205	0.186	0.186	0.18	0.18	0.168	0.219	0.225	0.257
OP503341.1	0.077	0.077	0.077	0.08	0.077	0.077	0.077	0.077	0.08	0.08	0.077	0.077	0.077	0.08	0.075	0	0	0	0	0.189	0.186	0.183	0.224	0.224	0.18	0.18	0.18	0.18	0.162	0.232	0.247	0.266
OP503334.1	0.077	0.077	0.077	0.08	0.077	0.077	0.077	0.077	0.08	0.08	0.077	0.077	0.077	0.08	0.075	0	0	0	0	0.189	0.186	0.183	0.224	0.224	0.18	0.18	0.18	0.18	0.162	0.232	0.247	0.266
KY610558.1	0.077	0.077	0.077	0.08	0.077	0.077	0.077	0.077	0.08	0.08	0.077	0.077	0.077	0.08	0.075	0	0	0	0	0.189	0.186	0.183	0.224	0.224	0.18	0.18	0.18	0.18	0.162	0.232	0.247	0.266
KY610559.1	0.077	0.077	0.077	0.08	0.077	0.077	0.077	0.077	0.08	0.08	0.077	0.077	0.077	0.08	0.075	0	0	0	0	0.189	0.186	0.183	0.224	0.224	0.18	0.18	0.18	0.18	0.162	0.232	0.247	0.266
MW160913.1	0.187	0.187	0.187	0.189	0.187	0.187	0.187	0.187	0.189	0.189	0.187	0.187	0.187	0.187	0.183	0.189	0.189	0.189	0.189	0	0.002	0.009	0.13	0.13	0.159	0.159	0.165	0.165	0.16	0.206	0.247	0.265
MW160930.1	0.19	0.19	0.19	0.192	0.19	0.19	0.19	0.19	0.192	0.192	0.19	0.19	0.19	0.183	0.187	0.186	0.186	0.186	0.186	0.002	0	0.007	0.133	0.133	0.162	0.162	0.168	0.168	0.163	0.203	0.25	0.268
MW160923.1	0.187	0.187	0.187	0.189	0.187	0.187	0.187	0.187	0.189	0.189	0.187	0.187	0.187	0.18	0.183	0.183	0.183	0.183	0.183	0.009	0.007	0	0.136	0.136	0.165	0.165	0.171	0.171	0.166	0.206	0.243	0.265
AY319472.1	0.208	0.208	0.208	0.208	0.208	0.208	0.208	0.208	0.211	0.211	0.208	0.208	0.208	0.208	0.205	0.224	0.224	0.224	0.224	0.13	0.133	0.136	0	0.009	0.189	0.189	0.189	0.189	0.187	0.222	0.257	0.295
OL799293.1	0.208	0.208	0.208	0.208	0.208	0.208	0.208	0.208	0.211	0.211	0.208	0.208	0.208	0.208	0.205	0.224	0.224	0.224	0.224	0.13	0.133	0.136	0.009	0	0.189	0.189	0.189	0.189	0.187	0.219	0.253	0.292
MW160936.1	0.189	0.189	0.189	0.189	0.189	0.189	0.189	0.189	0.192	0.192	0.189	0.189	0.189	0.192	0.186	0.18	0.18	0.18	0.18	0.159	0.162	0.165	0.189	0.189	0	0	0.005	0.005	0.037	0.225	0.273	0.269
MW160937.1	0.189	0.189	0.189	0.189	0.189	0.189	0.189	0.189	0.192	0.192	0.189	0.189	0.189	0.192	0.186	0.18	0.18	0.18	0.18	0.159	0.162	0.165	0.189	0.189	0	0	0.005	0.005	0.037	0.225	0.273	0.269
MW160934.1	0.183	0.183	0.183	0.183	0.183	0.183	0.183	0.183	0.186	0.186	0.183	0.183	0.183	0.186	0.18	0.18	0.18	0.18	0.18	0.165	0.168	0.171	0.189	0.189	0.005	0.005	0	0	0.042	0.232	0.266	0.275
MW160935.1	0.183	0.183	0.183	0.183	0.183	0.183	0.183	0.183	0.186	0.186	0.183	0.183	0.183	0.186	0.18	0.18	0.18	0.18	0.18	0.165	0.168	0.171	0.189	0.189	0.005	0.005	0	0	0.042	0.232	0.266	0.275
MW160931.1	0.171	0.171	0.171	0.171	0.171	0.171	0.171	0.171	0.174	0.174	0.171	0.171	0.171	0.177	0.168	0.162	0.162	0.162	0.162	0.16	0.163	0.166	0.187	0.187	0.037	0.037	0.042	0.042	0	0.219	0.273	0.258
AY319467.1	0.222	0.222	0.222	0.222	0.222	0.222	0.222	0.222	0.225	0.225	0.222	0.222	0.222	0.219	0.219	0.232	0.232	0.232	0.232	0.206	0.203	0.206	0.222	0.219	0.225	0.225	0.232	0.232	0.219	0	0.255	0.241
MT904380.1	0.222	0.222	0.222	0.225	0.222	0.222	0.222	0.222	0.225	0.225	0.222	0.222	0.222	0.225	0.225	0.247	0.247	0.247	0.247	0.247	0.25	0.243	0.257	0.253	0.273	0.273	0.266	0.266	0.273	0.255	0	0.227
KU901397.1	0.254	0.254	0.254	0.251	0.254	0.254	0.254	0.254	0.257	0.253	0.254	0.254	0.254	0.264	0.257	0.266	0.266	0.266	0.266	0.265	0.268	0.265	0.295	0.292	0.269	0.269	0.275	0.275	0.258	0.241	0.227	0
